# Supplementary material for: Pardosa pseudoannulata mother adopts a compensatory strategy for reproduction deficiency resulting from the suppression of EcR/USP-1-mediated ecdysteroid signaling
Source: Research Square preprint supplement (doi:10.21203/rs.3.rs-1762480/v1), 2022-06-23
Supplement: Supplementary file 1 [file 54e569375679eb0171c6b4f8.xlsx]

## Sheet: Table S2
Table S2 The number of NRs in the investigated species.
Subfamily	Nomenclature	Name	Abbreviation	Drosophila melanogaster		Anopheles gambiae		Apis mellifera		Tribolium castaneum		Bombyx mori		Aedes aegypti		Acyrthosiphon pisum		Nilaparvata lugens		Tetranychus urticae		Pardosa pseudoannulata
NR0	NR0A1	Knirps	Knr	1	3	1	2	1	3	Absence	2	Absence	1	Absence	1	Absence	2	1	3	Absence	1	Absence	0
	NR0A2	Knirps-like	Knrl	1		Absence		1		1		Absence		1		1		1		1		Absence
	NR0A3	Eagle	EG	1		1		1		1		1		Absence		1		1		Absence		Absence
NR1	NR1D3	Ecdysone-induced protein 75	E75	1	5	1	5	1	5	1	5	1	5	1	5	1	4	1	4	1	13	1	7
	NR1E1	Ecdysone-induced protein 78	E78	1		1		1		1		1		1		1		1		1		2
	NR1F4	Hormone receptor-like in 46	HR3	1		1		1		1		1		1		1		1		1		2
	NR1H1	Ecdysone receptor	EcR	1		1		1		1		1		1		1		1		1		1
	NR1J1	Hormone receptor-like in 96	HR96	1		1		1		1		1		1		Absence		Absence		8		1
	NR1M	Hormone receptor-like in 10	HR10	Absence		Absence		Absence		Absence		Absence		Absence		Absence		Absence		1		Absence
NR2	NR2A4	Hepatocyte nuclear factor 4	HNF4	1	8	1	9	1	9	1	9	1	8	1	9	1	8	1	8	1	10	1	10
	NR2B4	Ultraspiracle (retinoid X receptor)	USP (RXR)	1		1		1		1		1		1		1		1		2		2
	NR2D1	Hormone receptor-like in 78	HR78	1		1		1		1		1		1		1		Absence		1		1
	NR2E2	Tailless	Tll	1		2		1		1		1		1		1		1		1		1
	NR2E3	Hormone receptor-like in 51	HR51	1		Absence		1		1		1		1		1		1		1		2
	NR2E4	Dissatisfaction	Dsf	1		1		1		1		1		1		1		1		1		1
	NR2E5	Hormone receptor-like in 83	HR83	1		1		1		1		Absence		1		1		1		1		Absence
	NR2E6	Photoreceptor specific NR	PNR	Absence		1		1		1		1		1		Absence		1		1		Absence
	NR2F3	Seven up	SVP	1		1		1		1		1		1		1		1		1		2
NR3	NR3B4	Estrogen-related receptor	ERR	1	1	1	1	1	1	1	1	1	1	1	1	1	1	1	1	1	1	1	1
NR4	NR4A4	Hormone receptor-like in 38	HR38	1	1	1	1	1	1	1	1	1	1	1	1	1	1	1	1	2	2	1	1
NR5	NR5A3	Fushi tarazu transcription factor 1	FTZ-F1	1	2	1	2	1	2	1	2	1	2	1	2	1	2	1	2	1	2	1	2
	NR5B1	Hormone receptor-like in 39	HR39	1		1		1		1		1		1		1		1		1		1
NR6	NR6A2	Hormone receptor-like in 4	HR4	1	1	1	1	1	1	1	1	1	1	1	1	1	1	1	1	1	1	2	2
Total				21		21		22		21		19		20		19		20		30		23
Reference				Adams et al., 2000; King-Jones and Thummel, 2005		Bertrand et al., 2004		Velarde et al., 2006		Bonneton et al., 2008; Tan and Palli, 2008		Cheng et al., 2008		Cruz et al., 2009		Christiaens et al., 2010		Xu et al., 2017		Grbic et al., 2011		This study
