# Supplementary material for: Pardosa pseudoannulata mother adopts a compensatory strategy for reproduction deficiency resulting from the suppression of EcR/USP-1-mediated ecdysteroid signaling
Source: Research Square preprint supplement (doi:10.21203/rs.3.rs-1762480/v1), 2022-06-23
Supplement: Supplementary file 2 [file dd725ddd546c56aff9544834.docx]

**Table S3 The FPKM value of *EcR* and the two *USPs* in eleven developmental stages of *P. pesudoannulata*.**

| Sample | *EcR* | | | *USP-1* | | | *USP-2* | | |
| --- | --- | --- | --- | --- | --- | --- | --- | --- | --- |
| Biological replicate_1 | Biological replicate_2 | Biological replicate_3 | Biological replicate_1 | Biological replicate_2 | Biological replicate_3 | Biological replicate_1 | Biological replicate_2 | Biological replicate_3 |
| E | 7.77 | 7.97 | 8.32 | 1.15 | 0.46 | 0.19 | 0.00 | 0.00 | 0.00 |
| ES | 19.69 | 21.31 | 23.36 | 0.36 | 0.25 | 0.62 | 1.15 | 1.23 | 0.73 |
| AS | 20.40 | 21.36 | 19.70 | 0.00 | 0.00 | 0.11 | 0.51 | 1.66 | 1.11 |
| DS | 19.64 | 19.48 | 18.15 | 0.11 | 0.00 | 0.31 | 0.76 | 0.82 | 1.10 |
| VM | 5.47 | 4.12 | 4.33 | 0.14 | 0.39 | 0.19 | 0.17 | 0.05 | 0.23 |
| VF | 3.53 | 5.12 | 4.61 | 0.00 | 0.80 | 0.00 | 0.40 | 0.22 | 0.37 |
| MF | 2.11 | 2.22 | 11.60 | 1.99 | 0.88 | 0.00 | 0.00 | 0.00 | 0.00 |
| EESF | 2.69 | 4.85 | 2.77 | 0.63 | 1.00 | 0.65 | 0.12 | 0.16 | 0.06 |
| LESF | 6.23 | 8.36 | 7.36 | 0.05 | 0.00 | 0.00 | 0.33 | 0.39 | 0.27 |
| SCF | 2.96 | 12.49 | 1.98 | 1.98 | 0.00 | 1.18 | 0.13 | 0.33 | 0.06 |
| NSCF | 1.62 | 1.96 | 1.49 | 0.46 | 1.13 | 1.05 | 0.00 | 0.11 | 0.00 |
